# Supplementary material for: Biphasic Regulation of Lipid Metabolism: A Meta-Analysis of Icodextrin in Peritoneal Dialysis
Source: Hindawi journal article supplement (doi:10.1155/2015/208980), 2015-01-01
Supplement: f1 [file 208980.f1.pdf]

**Table 1 Effect of icodextrin use on glucose mentalism (RCT and cohort studies).**

| Factor                        | No. of studies | Heterogeneity test |                |         |                            | Weighted mean difference |                  |         |
|-------------------------------|----------------|--------------------|----------------|---------|----------------------------|--------------------------|------------------|---------|
|                               |                | Q                  | I <sup>2</sup> | P-Value | Model of meta <sup>a</sup> | Mean                     | [95% CI]         | P-Value |
| <b>Body mass index(kg/m2)</b> | 2              | <0.1               | <0.01%         | >0.999  | F                          | -0.05                    | [-0.339, 0.239]  | 0.735   |
| <b>Body weight (kg)</b>       | 3              | 3.45               | 42.00%         | 0.178   | F                          | -1.806                   | [-5.071, 1.459]  | 0.278   |
| <b>Albumin(g/L)</b>           | 2              | 0.88               | 0.00%          | 0.347   | F                          | -0.56                    | [-1.068, -0.052] | 0.031*  |
| <b>HbA1c(%)</b>               | 4              | 57.16              | 94.80%         | <0.001  | R                          | -0.747                   | [-1.693, 0.199]  | 0.122   |
| <b>Insulin (mU/L)</b>         | 2              | 1.42               | 29.60%         | 0.233   | F                          | -2.768                   | [-11.182, 5.647] | 0.519   |

Note: \* The P-value was less than 0.05, and the WMD was considered statistically significant.

**Table 2 Effect of icodextrin use on glucose mentalism (cross-sectional).**

| Factor                        | No. of studies | Heterogeneity test |                |         |                            | Weighted mean difference |                   |         |
|-------------------------------|----------------|--------------------|----------------|---------|----------------------------|--------------------------|-------------------|---------|
|                               |                | Q                  | I <sup>2</sup> | P-Value | Model of meta <sup>a</sup> | Mean                     | [95% CI]          | P-Value |
| <b>Body mass index(kg/m2)</b> | 4              | 3.36               | 10.7%          | 0.340   | F                          | 0.433                    | [-0.713, 1.580]   | 0.459   |
| <b>Body weight (kg)</b>       | 2              | 0.40               | <0.01%         | 0.527   | F                          | 7.852                    | [3.203, 12.500]   | 0.001*  |
| <b>CAPD duration(months)</b>  | 2              | 2.68               | 62.60%         | 0.102   | F                          | 3.199                    | [-3.829, 10.227]  | 0.372   |
| <b>Albumin(g/L)</b>           | 3              | 3.10               | 35.40%         | 0.213   | F                          | -0.160                   | [-0.321, 0.000]   | 0.050   |
| <b>Glucose (mmol/L)</b>       | 3              | 2.27               | 12.0%          | 0.321   | F                          | 3.868                    | [-7.947, 15.682]  | 0.521   |
| <b>Insulin(mU/L)</b>          | 2              | 0.20               | <0.01%         | 0.659   | F                          | -11.751                  | [-17.652, -5.849] | <0.001* |

Note: \* The P-value was less than 0.05, and the WMD was considered statistically significant.

**Table 3 Effect of icodextrin on glucose mentalism (in subgroups of duration).**

| Factor                        | Duration | No. of studies | Heterogeneity test |                |         |                | Weighted mean difference |                  |         |
|-------------------------------|----------|----------------|--------------------|----------------|---------|----------------|--------------------------|------------------|---------|
|                               |          |                | Q                  | I <sup>2</sup> | P-Value | Model of metaa | Mean                     | [95% CI]         | P-Value |
| <b>Body mass index(kg/m2)</b> | <6 month | 2              | <0.01              | <0.01%         | >0.99   | F              | -0.050                   | [-0.339, 0.239]  | 0.735   |
| <b>Body weight (kg)</b>       | <6 month | 3              | 0.49               | 41.60%         | 0.691   | F              | -0.655                   | [-3.883, 2.573]  | 0.454   |
|                               | ≥6 month | 2              | 2.25               | 55.5%          | 0.134   | F              | -1.738                   | [-5.233, 1.756 ] | 0.330   |
| <b>Albumin(g/L)</b>           | <6 month | 2              | 0.24               | <0.01%         | 0.622   | F              | -0.394                   | [-0.905, 0.117]  | 0.131   |
| <b>Insulin (mU/L)</b>         | <6 month | 3              | 11.00              | 81.80%         | 0.004   | R              | -0.740                   | [-1.551, 0.070]  | 0.073   |
| <b>HbA1c(%)</b>               | <6 month | 2              | 0.9                | 0.00%          | 0.342   | F              | -0.048                   | [-0.335, 0.239]  | 0.744   |

Note: \* The *P*-value was less than 0.05, and the WMD was considered statistically significant.

**Table 4 Effect of icodextrin on glucose mentalism (in subgroups of diabetes).**

| Factor                  | Diabetes | No. of studies | Heterogeneity test |                |         |               | Weighted mean difference |                   |         |
|-------------------------|----------|----------------|--------------------|----------------|---------|---------------|--------------------------|-------------------|---------|
|                         |          |                | Q                  | I <sup>2</sup> | P-Value | Model of meta | WMD                      | [95% CI]          | P-Value |
| <b>Body weight (kg)</b> | Diabetes | 2              | 3.27               | 69.40%         | 0.071   | R             | -2.076                   | [-5.571, 1.419]   | 0.244   |
| <b>Glucose (mmol/L)</b> | Non      | 2              | 0.86               | 0.00%          | 0.354   | F             | -0.175                   | [ -0.397, 0.046]  | 0.12    |
| <b>HbA1c(%)</b>         | Diabetes | 2              | 0.91               | 0.00%          | 0.343   | R             | -0.51                    | [ -0.415, -0.605] | 0.049*  |
|                         | Non      | 2              | 1.52               | 33.10%         | 0.245   | R             | -0.268                   | [-0.418, -0.118]  | <0.001* |
| <b>Insulin (mU/L)</b>   | Diabetes | 2              | 0.68               | 0.00%          | 0.408   | R             | -3.205                   | [-5.641, -0.769]  | 0.01*   |
|                         | Non      | 2              | 0.22               | 0.00%          | 0.643   | R             | -0.791                   | [ -1.440, -0.143] | 0.017*  |

Note: \* The *P*-value was less than 0.05, and the WMD was considered statistically significant.

**Table 5 Effect of icodextrin on glucose mentalism in diabetes patients (in subgroups of duration).**

| Factor(D)        | Duration | No. of studies | Heterogeneity test |                |         |                | Weighted mean difference |                  |         |
|------------------|----------|----------------|--------------------|----------------|---------|----------------|--------------------------|------------------|---------|
|                  |          |                | Q                  | I <sup>2</sup> | P-Value | Model of metaa | Mean                     | [95% CI]         | P-Value |
| Body weight (kg) | <6 month | 2              | 3.34               | 70.00%         | 0.068   | R              | -1.414                   | [-4.863, 2.035]  | 0.422   |
|                  | ≥6 month | 2              | 3.27               | 69.40%         | 0.071   | F              | -2.076                   | [-5.571, 1.419]  | 0.244   |
| HbA1c(%)         | <6 month | 2              | 1.62               | 38.40%         | 0.203   | F              | -0.086                   | [-0.619, 0.448]  | 0.752   |
| Insulin (mU/L)   | <6 month | 2              | 5.43               | 81.60%         | 0.02    | R              | -3.721                   | [-6.130, -1.313] | 0.002*  |

Note: \* The *P*-value was less than 0.05, and the WMD was considered statistically significant.

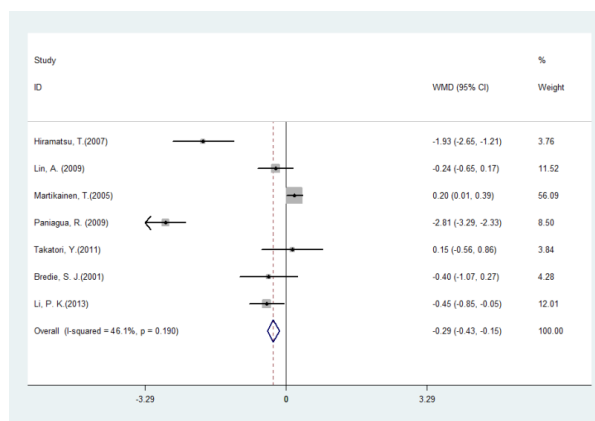

Figure 1. Forest plot of comparison (RCT and cohort studies): ICO vs GLU: Outcome: Total cholesterol (mmol/L).

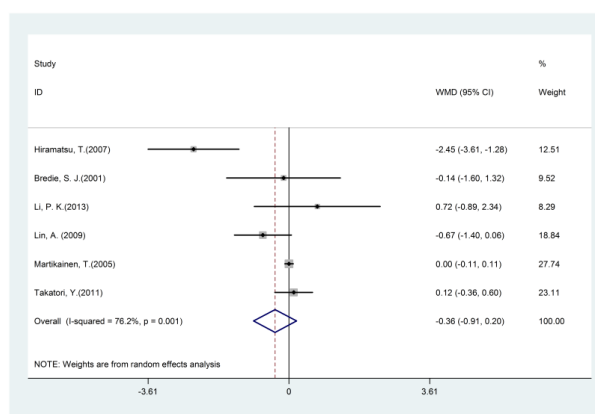

Figure 2. Forest plot of comparison (RCT and cohort studies): ICO vs GLU: Outcome: Triglycerides (mmol/L).

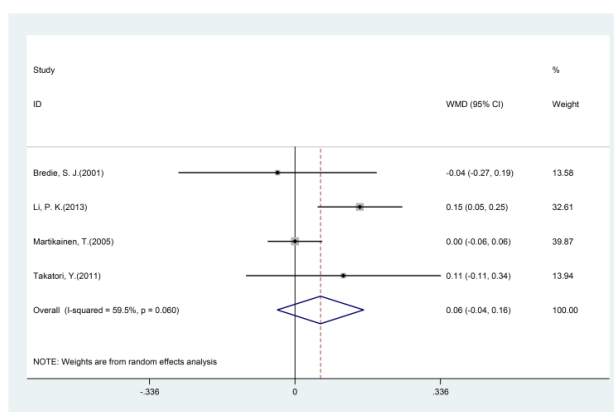

Figure 3. Forest plot of comparison (RCT and cohort studies): ICO vs GLU: Outcome: HDL-C (mmol/L).

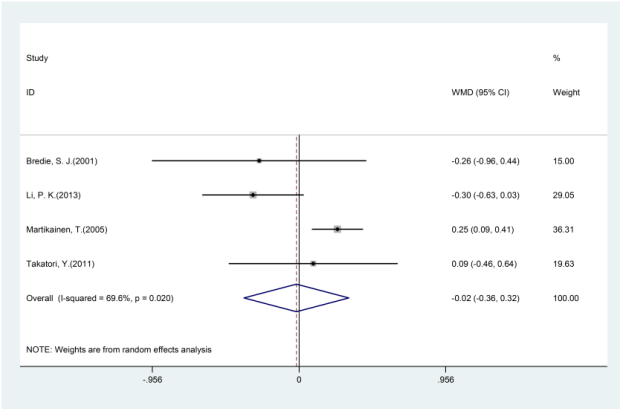

Figure 4. Forest plot of comparison (RCT and cohort studies): ICO vs GLU: Outcome: LDL-C (mmol/L).

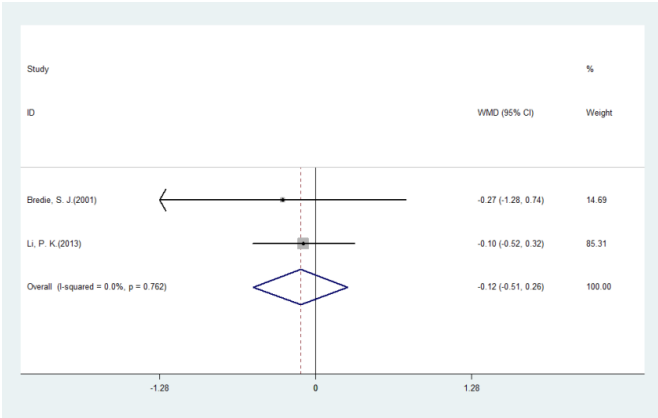

Figure 5. Forest plot of comparison (RCT and cohort studies): ICO vs GLU: Outcome: LDL-C (mmol/L).

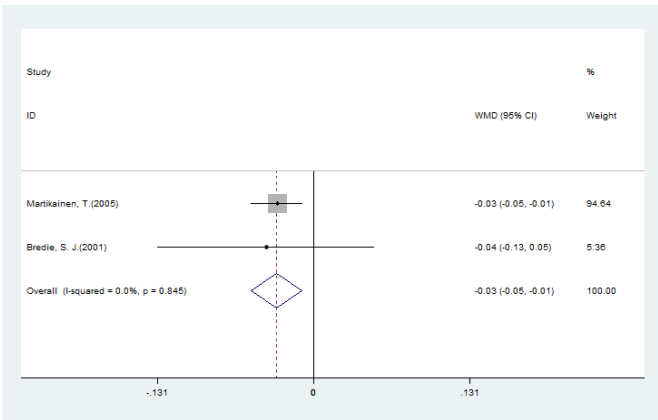

Figure 6. Forest plot of comparison (RCT and cohort studies): ICO vs GLU: Outcome: FFA (mol/L).

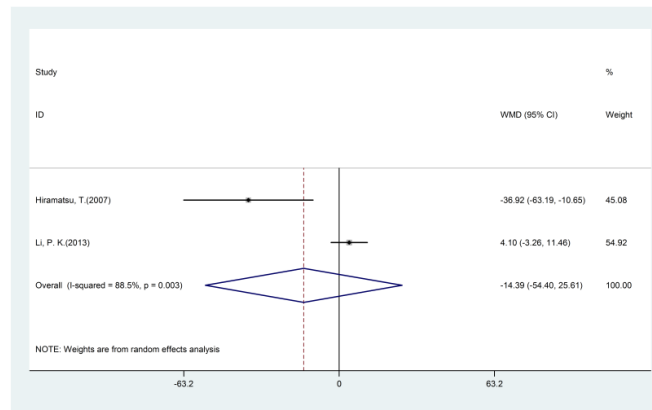

Figure 7. Forest plot of comparison (RCT and cohort studies): ICO vs GLU: Outcome: Lipoprotein (a) (mg/dL).

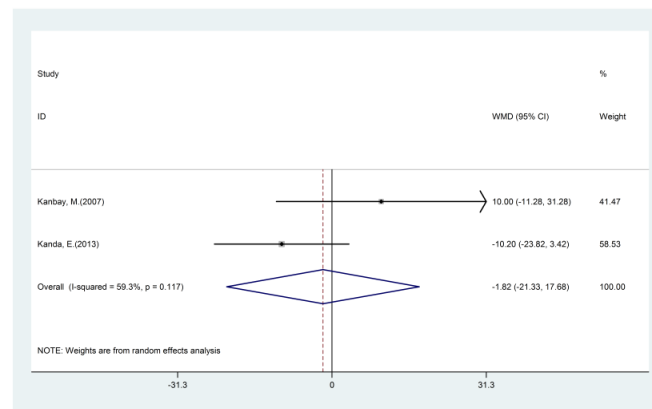

Figure 8. Forest plot of comparison (cross-sectional studies): ICO vs GLU: Outcome: APO-B (mg/dL).

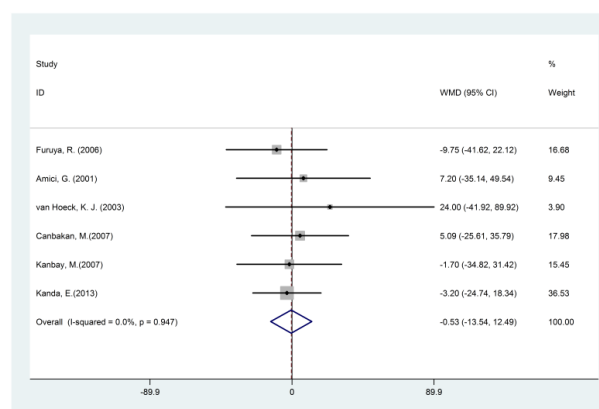

Figure 9. Forest plot of comparison (cross-sectional studies): ICO vs GLU: Outcome: Total cholesterol (mmol/L).

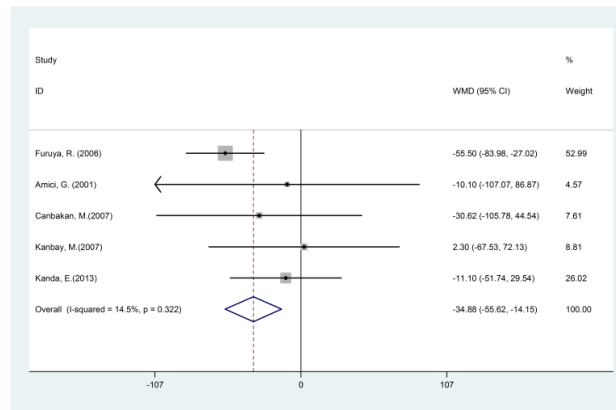

Figure 10. Forest plot of comparison (cross-sectional studies): ICO vs GLU: Outcome: Triglycerides (mmol/L).

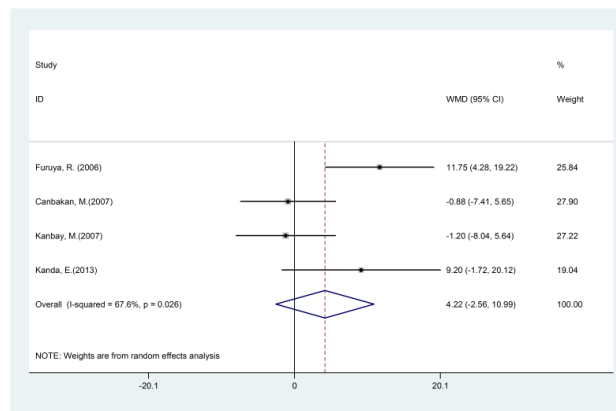

Figure 11. Forest plot of comparison (cross-sectional studies): ICO vs GLU: Outcome: HDL-C (mmol/L).

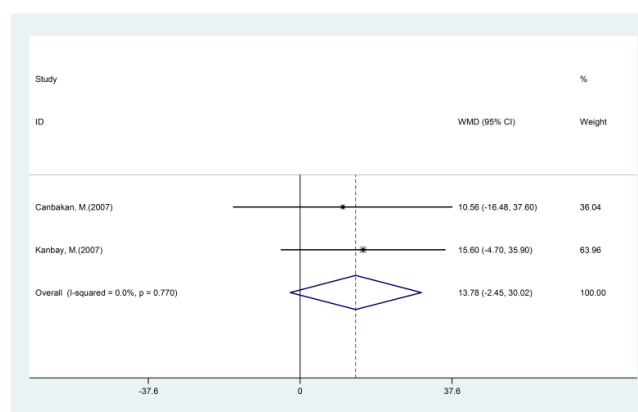

Figure 12. Forest plot of comparison (cross-sectional studies): ICO vs GLU: Outcome: LDL-C (mmol/L).

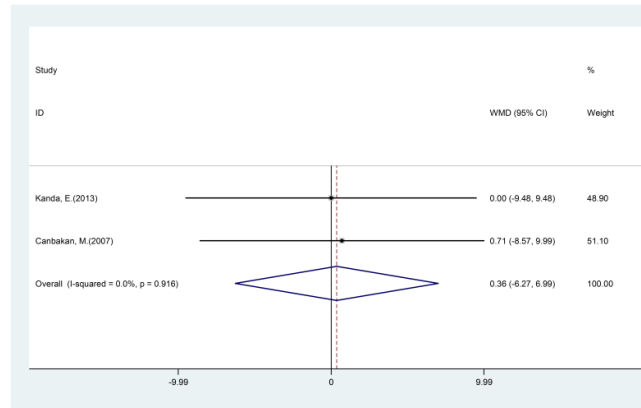

Figure 13. Forest plot of comparison (cross-sectional studies): ICO vs GLU: Outcome: VLDL-C (mmol/L).

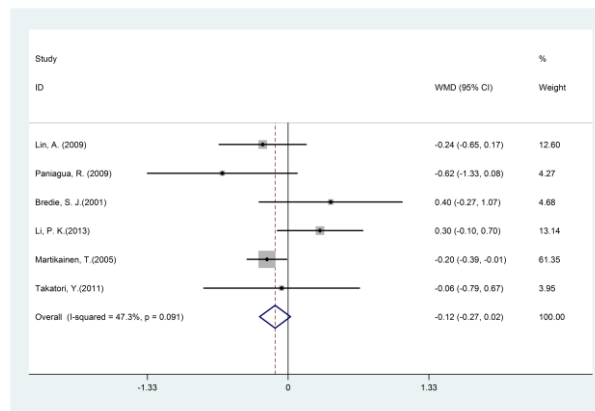

Figure 14. Forest plot of comparison (in subgroups of duration, <6 month): ICO vs GLU: Outcome: Total cholesterol (mmol/L).

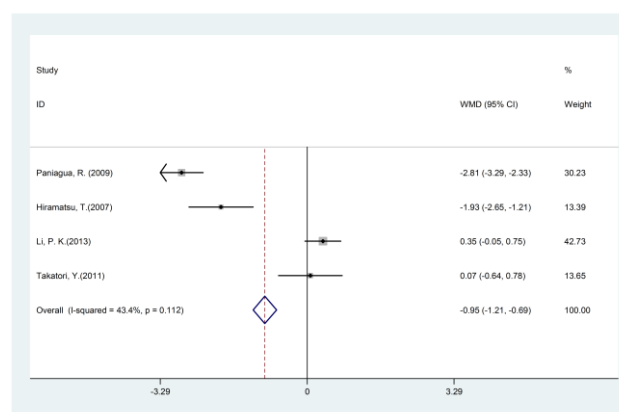

Figure 15. Forest plot of comparison (in subgroups of duration, ≥6 month): ICO vs GLU: Outcome: Total cholesterol (mmol/L).



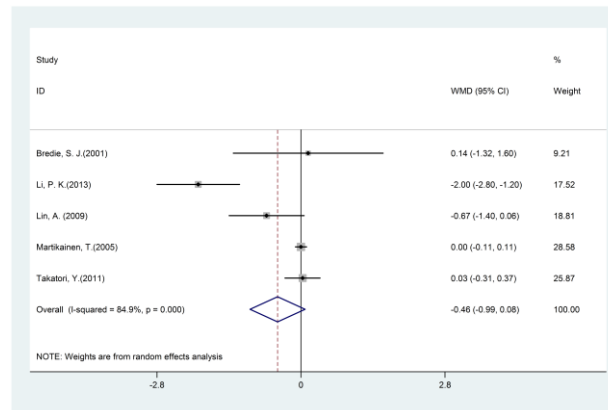

Figure 16. Forest plot of comparison (in subgroups of duration, <6 month): ICO vs GLU: Outcome: Triglycerides (mmol/L).

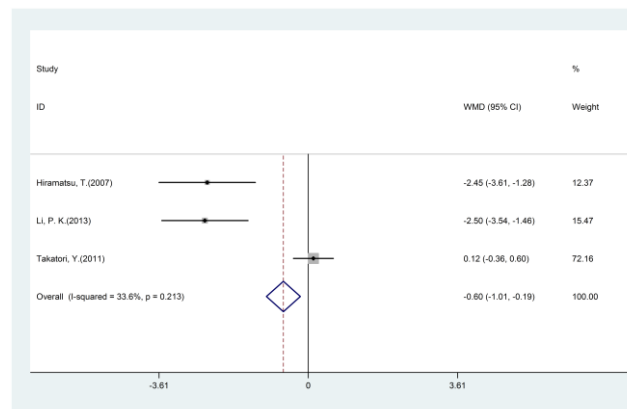

Figure 17. Forest plot of comparison (in subgroups of duration, ≥6 month): ICO vs GLU: Outcome: Triglycerides (mmol/L).

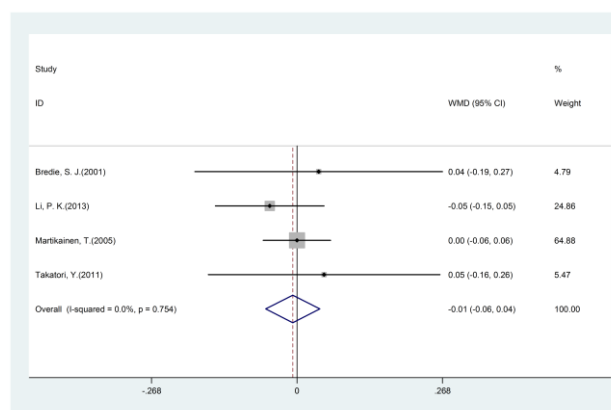

Figure 18. Forest plot of comparison (in subgroups of duration, <6 month): ICO vs GLU: Outcome: HDL-C (mmol/L).

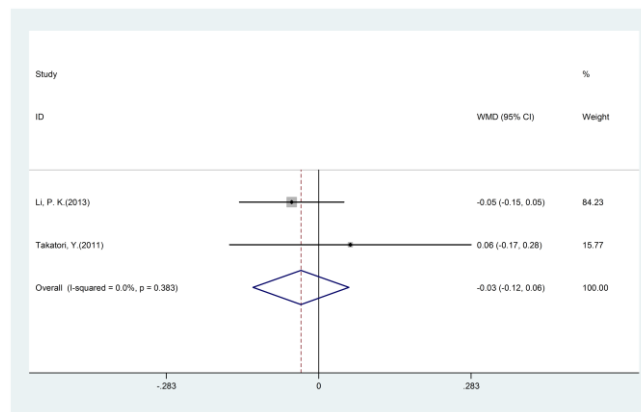

Figure 19. Forest plot of comparison (in subgroups of duration,  $\geq 6$  month): ICO vs GLU: HDL-C (mmol/L).

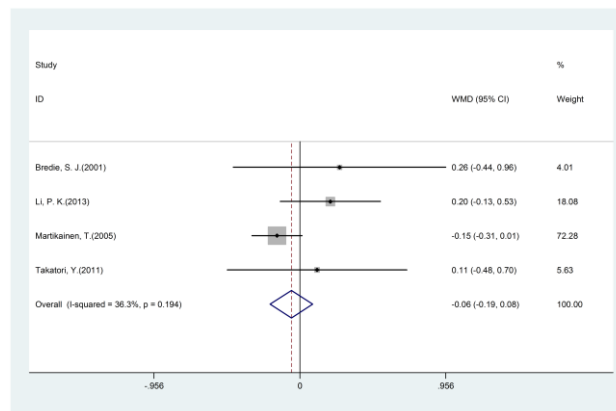

Figure 20. Forest plot of comparison (in subgroups of duration,  $< 6$  month): ICO vs GLU: Outcome: LDL-C (mmol/L).

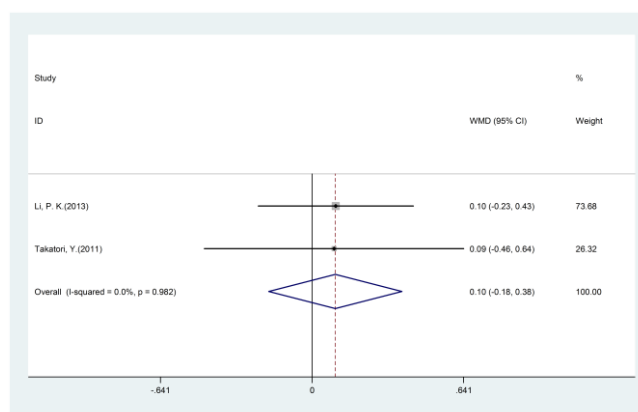

Figure 21. Forest plot of comparison (in subgroups of duration,  $\geq 6$  month): ICO vs GLU: LDL-C (mmol/L).

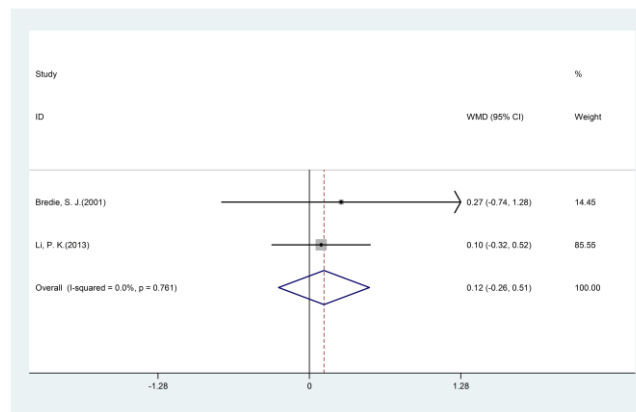

Figure 22. Forest plot of comparison (in subgroups of duration, <6 month): ICO vs GLU: Outcome: VLDL-C (mmol/L).

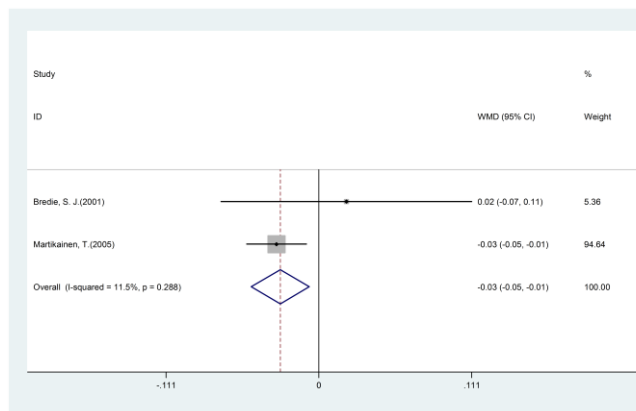

Figure 23. Forest plot of comparison (in subgroups of duration, <6 month): ICO vs GLU: Outcome: FFA (mmol/L).

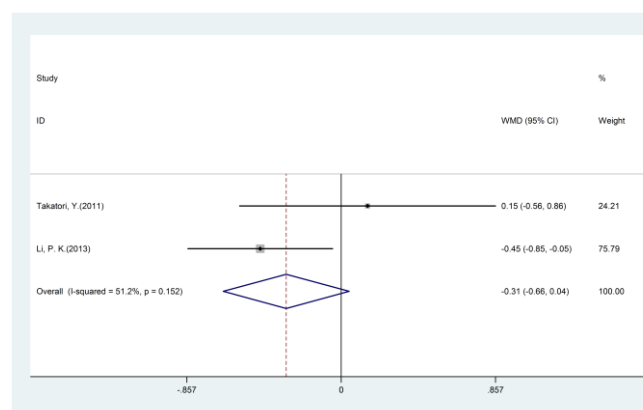

Figure 24. Forest plot of comparison (in subgroups of diabetes): ICO vs GLU: Outcome: Total cholesterol (mmol/L).

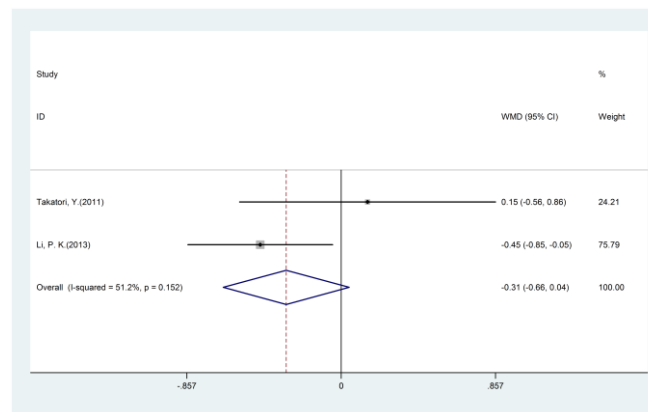

Figure 25. Forest plot of comparison (in subgroups of diabetes): ICO vs GLU:  
Outcome: Triglycerides (mmol/L).

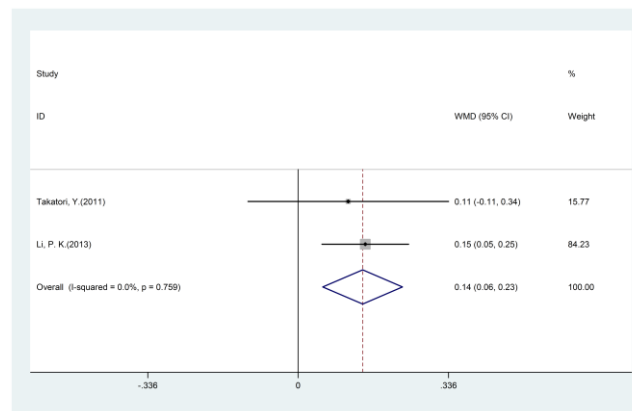

Figure 26. Forest plot of comparison (in subgroups of diabetes): ICO vs GLU:  
Outcome: HDL-C (mmol/L).

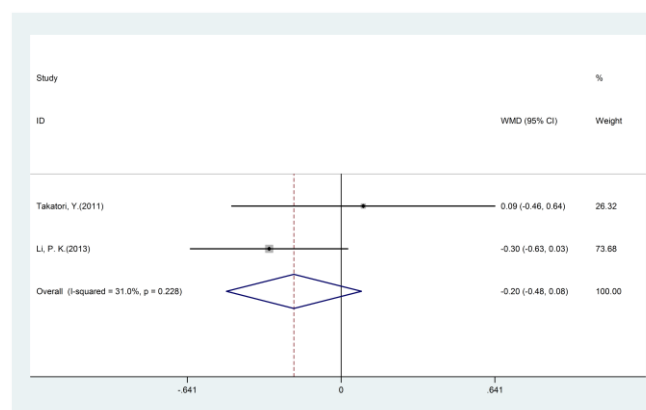

Figure 27. Forest plot of comparison (in subgroups of diabetes): ICO vs GLU:  
Outcome: LDL-C (mmol/L).

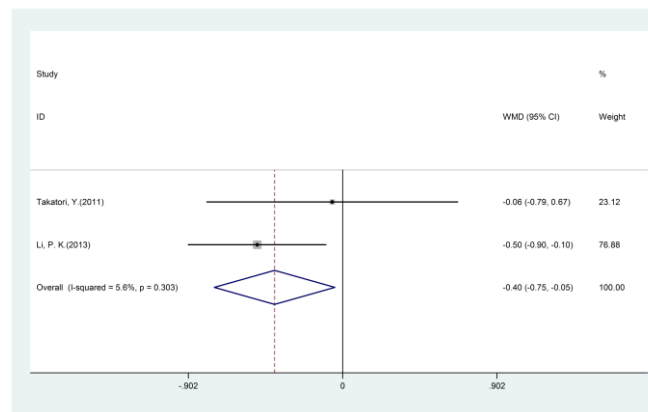

Figure 28. Forest plot of comparison (in subgroups of diabetes, <6 month): ICO vs GLU: Outcome: Total Cholesterol (mmol/L).

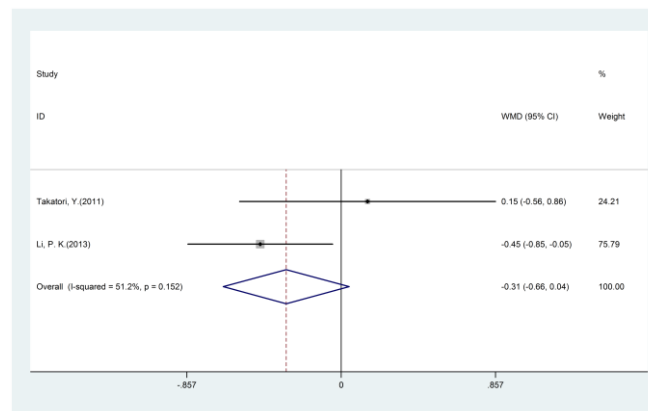

Figure 29. Forest plot of comparison (in subgroups of diabetes, ≥6 month): ICO vs GLU: Outcome: Total Cholesterol (mmol/L).

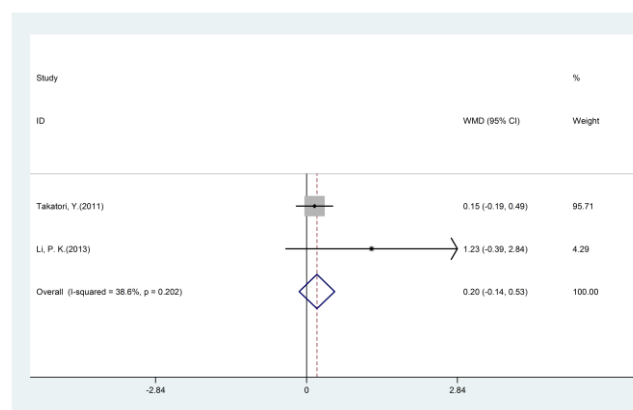

Figure 30. Forest plot of comparison (in subgroups of diabetes, <6 month): ICO vs GLU: Outcome: Triglycerides (mmol/L).

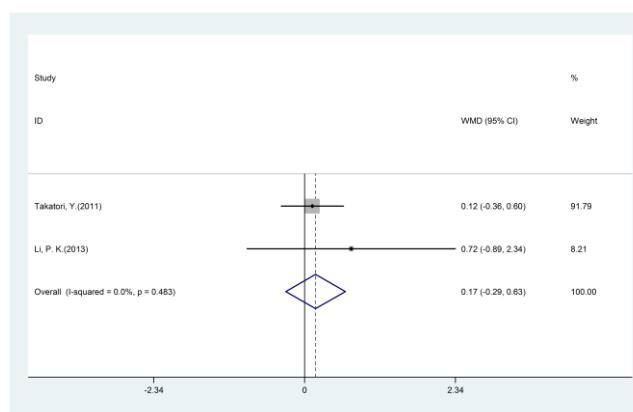

Figure 31. Forest plot of comparison (in subgroups of diabetes,  $\geq 6$  month): ICO vs GLU: Outcome: Triglycerides (mmol/L).

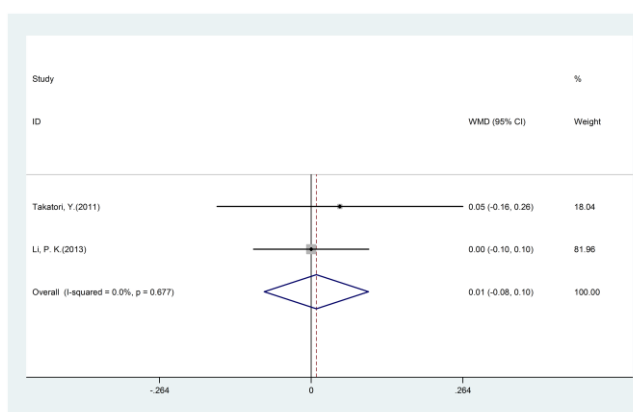

Figure 32. Forest plot of comparison (in subgroups of diabetes,  $< 6$  month): ICO vs GLU: Outcome: HDL-C (mmol/L).

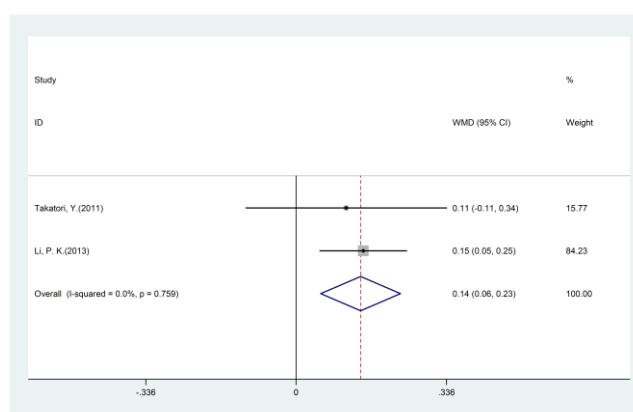

Figure 33. Forest plot of comparison (in subgroups of diabetes,  $\geq 6$  month): ICO vs GLU: Outcome: HDL-C (mmol/L).

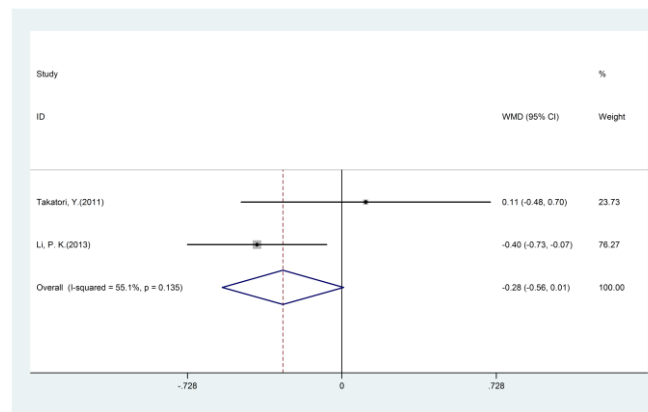

Figure 34. Forest plot of comparison (in subgroups of diabetes, <6 month): ICO vs GLU: Outcome: LDL-C (mmol/L).

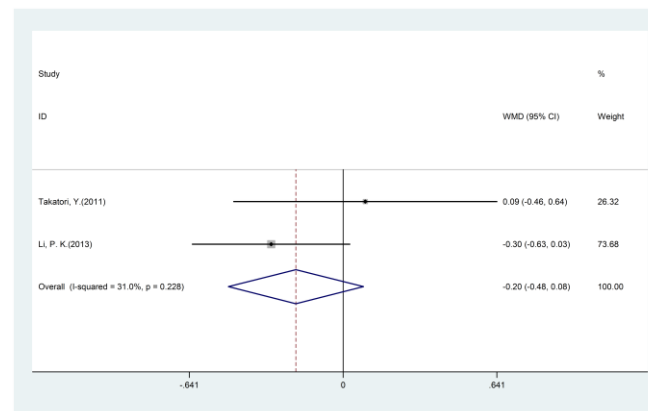

Figure 35. Forest plot of comparison (in subgroups of diabetes,  $\geq 6$  month): ICO vs GLU: Outcome: LDL-C (mmol/L).
